# Supplementary material for: Bioinformatic prediction of immunodominant regions in spike protein for early diagnosis of the severe acute respiratory syndrome coronavirus 2 (SARS-CoV-2)
Source: PeerJ journal article supplement (doi:10.7717/peerj.11232), 2021-04-08
Supplement: Fig_S1.pdf [file Fig_S1.pdf]

1                    10                    20                    30                    40                    50  
|                    |                    |                    |                    |                    |  
MFVFLVLLPLVSSQCVNLTTRTQLPPAYTNSFTRGVYYPDKVFRSSVLHS  
-----LSSSSLLLLLLLLLLLLLLLLSSSS  
TQDLFLPFFSNVTWFHAIHVS GTNGTKRFDNPVLPFNDGVYFASTEKSNI  
SSSSSLLLISSSSSL-----LLLLLLLLLSSSSSLLLLLL  
IRGWIFGTTLDSKTQSLIVN NATNVV IKVCEFQFCNDPFLGVYYHKNNK  
LLLLLSSLLLLLLLLSSLLSSLLLLSSSSLLLLLLLLLLLL-----  
SWMESEFRVYSSANNCTFEYVSQPFLMDLE GKQGNFKNLREFVFKNIDGY  
----LLLLLLLLLLLLLLLLSSSSLLLI-----LSSSSSSSSSSLLS  
FKIYSKHTPINLVRDLPQGFSALEPLVDLP IGINITRFQTLALHRSYLT  
SSSSSSSSSL-----LLLLLLSSSSSSLLLLLLLLLLLL-----  
PGDSSSGWTAGAAA YVGYLQPRTFLLKYNENGTITDAVDCALDPLSETK  
-----LSSSLLSSSSSSSSSSLLLLLSSSSSSLLLLLHHHHH  
CTLKSFTVEKGIYQTSNFRVQPTESIVRFPNITNLCPFGEVFNATRFASV  
HHHHLLLLLLSSSSSSSSSSLLSSSSSSLLLLLLLLLLHHHHHHLLLLLLL  
YAWNRKRI SNCVADYSVLYNSASFSTFKCYGVSPTKLN DLCF TNVYADSF  
LLSSSSSSLLSSLLHHHHHHLLLLLSSSSLLIHHHHHHHHLLSSSSSSSS  
VIRGDEV RQIAPGQTGKIADYNYKLPDDFTGCVIAWNSNNLDSKVG GNYN  
SSSLHHHHHHLLLLLHHHHHHLLLLLLLLLLSSSSSSLLLLLL-----LL  
YLYRLFRKSNLKP FERDISTEIQAGSTPCNGVEGFNCYFPLQSYGFQPT  
SSSL-----LLLLLLLLLLLLLLI-----LLLLLLSSSLLLLLL  
NGVGYPYRVVLSFELLHAPATVCGPKKSTNLVKNKCVNFNFNGLTGTG  
--LLLLSSSSSSSSSSSSLLLLLLSSLLLLLLLLLLLLSSSSSSLLSSSS  
VLTESNKKFLPFQQFGRDIADTTDAVRDPQTLEILDI TPCSEGGVSVITP  
SSSSLLLLLLLLLLSSSLLLLLSSSSSLLLLLLSSSSSLLLLLLLLLLLLLL  
GTNTSNQVAVLYQDVNCTEVPVAIHADQLTPTWRVYSTGSNVFQTRAGCL  
LLLLLLLLLSSSSSLLLLLLI-----LLLLSSSSLISSS  
IGAEHVNNSYECDIPIGAGICASYQTQTNSPRRAR  
SLLSSLLLLLLLLLLSSSLLSSLI-----
